# Supplementary material for: Plutonium and transplutonium element trioxides: molecular structures, chemical bonding, and isomers
Source: Royal Society of Chemistry journal article supplement (doi:10.1039/c5cp02190a), 2015-01-01

## Plutonium and transplutonium element trioxides: molecular structures, chemical bonding, isomers. Supplementary data

Table 1: Calculated equilibrium energies  $\Delta E$  and enthalpies  $\Delta H_0^\circ$  at 0 K (kJ/mol) of An·3O isomers with respect to those of (AnO<sub>2</sub> + 1/2 O<sub>2</sub>).

| Species          | $\Delta E$ | $\Delta H_0^\circ$ | Species                           | $\Delta E$ | $\Delta H_0^\circ$ | Species                           | $\Delta E$ | $\Delta H_0^\circ$ |
|------------------|------------|--------------------|-----------------------------------|------------|--------------------|-----------------------------------|------------|--------------------|
| PuO <sub>3</sub> | -126       | -124               | PuO(O <sub>2</sub> ) <sup>p</sup> | 59         | 59                 |                                   |            |                    |
| AmO <sub>3</sub> | -47        | -45                | AmO(O <sub>2</sub> ) <sup>p</sup> | 40         | 41                 | AmO(O <sub>2</sub> ) <sup>s</sup> | 55         | 57                 |
| CmO <sub>3</sub> | 25         | 26                 | CmO(O <sub>2</sub> ) <sup>p</sup> | 17         | 19                 | CmO(O <sub>2</sub> ) <sup>s</sup> | -8         | -5                 |
| BkO <sub>3</sub> | -49        | -47                | BkO(O <sub>2</sub> ) <sup>p</sup> | 30         | -32                | BkO(O <sub>2</sub> ) <sup>s</sup> | 0          | 3                  |
| CfO <sub>3</sub> | 38         | 39                 | CfO(O <sub>2</sub> ) <sup>p</sup> | 53         | 55                 | CfO(O <sub>2</sub> ) <sup>s</sup> | 12         | 15                 |

Table 2: Full list of vibrational frequencies of An $\cdot$ 3O molecules (in cm $^{-1}$ ).

---

|                   |     |     |     |     |     |      |
|-------------------|-----|-----|-----|-----|-----|------|
| PuO $_3$          | 239 | 257 | 278 | 803 | 911 | 957  |
| AmO $_3$          | 214 | 250 | 283 | 479 | 850 | 954  |
| CmO $_3$          | 196 | 228 | 238 | 507 | 770 | 884  |
| BkO $_3$          | 188 | 204 | 247 | 533 | 819 | 905  |
| CfO $_3$          | 180 | 234 | 274 | 528 | 816 | 911  |
| PuO(O $_2$ ) $^p$ | 109 | 136 | 477 | 542 | 842 | 927  |
| AmO(O $_2$ ) $^p$ | 116 | 167 | 474 | 523 | 824 | 940  |
| CmO(O $_2$ ) $^p$ | 128 | 159 | 474 | 518 | 777 | 936  |
| BkO(O $_2$ ) $^p$ | 130 | 163 | 488 | 498 | 780 | 923  |
| CfO(O $_2$ ) $^p$ | 160 | 161 | 401 | 511 | 791 | 952  |
| AmO(O $_2$ ) $^s$ | 142 | 167 | 324 | 393 | 836 | 1201 |
| CmO(O $_2$ ) $^s$ | 158 | 173 | 373 | 396 | 831 | 1236 |
| BkO(O $_2$ ) $^s$ | 146 | 154 | 319 | 407 | 845 | 1210 |
| CfO(O $_2$ ) $^s$ | 135 | 144 | 372 | 383 | 852 | 1236 |

---

Table 3: Geometrical parameters (internuclear separations  $r$  in Å, angles in degrees, see the figure below for the atom numbering) of peroxide-like structures of AnO<sub>3</sub> dimers. Full data on the equilibrium geometries of oxide-like structures are provided in Supplementary material for Ref. [5].

| An | $r(\text{O3-O4})$ | $r(\text{An1-O3})$ | $r(\text{An1-O1})$ | $r(\text{An1-O2})$ | $\angle\text{An1O3O4An2}$ | $\angle\text{O1An1O2}$ | $\angle\text{O1An1O3}$ |
|----|-------------------|--------------------|--------------------|--------------------|---------------------------|------------------------|------------------------|
| Pu | 1.472             | 2.284              | 1.749              | 1.751              | 143                       | 174                    | 94                     |
| Am | 1.485             | 2.277              | 1.746              | 1.746              | 144                       | 175                    | 93                     |
| Bk | 1.479             | 2.243              | 1.775              | 1.777              | 143                       | 166                    | 97                     |

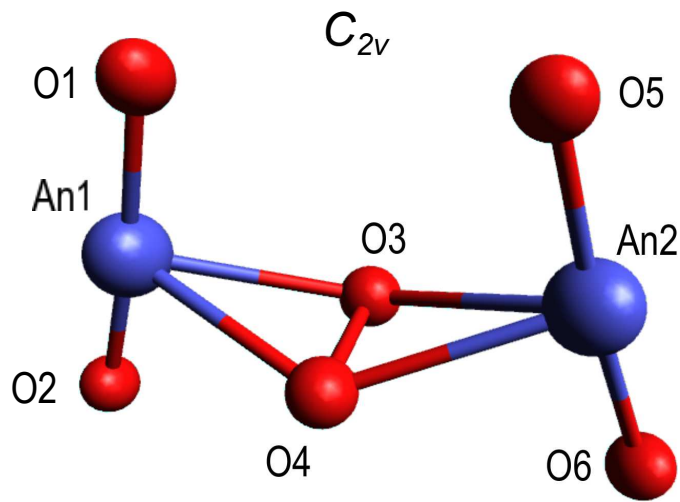

Supplement: c5cp02190a1.pdf [file c5cp02190a1.pdf]
